1 A comparative study of multidrug resistant bacteria (MDRB) isolated from various patients in  
2 different wards of a hospital during post Covid-19

3

4 Abhishek Ojha<sup>1</sup>□, Dwight Figueiredo<sup>1</sup>, Shabnum Khan<sup>1</sup>

5 <sup>1</sup>Symbiosis Institute of Health Sciences, Symbiosis International (Deemed University),

6 Lavale (Hill Base), Pune 412115, Maharashtra, India.

7 \* Corresponding author; Abhishek Ojha; Email: ab.ojha@gmail.com

8 Dwight Figueiredo; Email: drdwight@sihspune.org

9 Shabnum Khan; Email: 42khanshabnum@gmail.com

10

## 11 **Abstract**

12 Antibacterial resistance is an alarming global concern and a public health challenge of the  
13 twenty-first century for which effective systems are required to track and treat ABR. We  
14 performed microbiological and antibiotic susceptibility testing on the samples to detect and  
15 characterize Multidrug-Resistant Bacteria (MDRB) isolated from patients segregating MDRB  
16 characteristics (types, prevalence and distribution of MDRB) based on time (i.e., during  
17 versus post covid-19) and location (i.e., different wards of a tertiary care hospital). We  
18 observed an increase of MDRB in 2022 as compared to 2021 and 2023. These MDRB had a  
19 Shannon and Simpson index values of 1.138 to 1.508 and 0.643 to 0.775, respectively and an  
20 observed evenness values of 0.780 to 1.042, which revealed the microbial diversity recovered  
21 from the patient samples. In keeping with previous MDR studies, *Klebsiella*, *E. coli*,  
22 *Citrobacter*, *Acinetobacter* and *Pseudomonas* were identified from the patient samples.  
23 Moreover, compared to previous reports, the percentage of MDR-bacteria, i.e., *Klebsiella* (40

24 %), *E. coli* (28 %), and *Citrobacter* (19 %), populations were higher in this study. We  
25 observed that Gamma-proteobacteria were predominant across all the recovered samples, and  
26 that *Acinetobacter* and *Klebsiella* isolated from the samples were 100 % resistant to twenty  
27 and eleven antibiotics, respectively. Furthermore, the fatality rate was low compared with the  
28 available reports suggesting possibilities for effective recovery if given rapid and tailored  
29 treatment. Given the challenges faced by MDRB strains more surveillance and tracking is  
30 needed to ensure effective and specifically targeted treatment strategies.

31 **Keywords:** Multi-drug resistant, Microbes, Antimicrobial susceptibility testing, comorbid,  
32 Covid-19, Healthcare.

### 33 **1. Introduction**

34 Over the previous decades, it has been observed that antibiotic resistance is increasing to  
35 precariously high levels all over the world as new mechanisms of resistance are looming and  
36 spreading worldwide (Alós et al., 2015; Hernando-Amado et al., 2019). Widespread, non-  
37 specific, and uninterrupted use of antibacterial antibiotics in treating bacterial infections has  
38 been well documented in fuelling resistance among the distinct elements of bacterial  
39 populations (Klein et al., 2018; Carvalho et al., 2022). Due to the continuous need of  
40 antibacterial substances active against resistant gram-negative microflora, gram-positive  
41 multi drug resistant (MDR) pathogens have been overwhelmed by gram-negative bacterial  
42 infections (Jones, 2001). Among gram-negative microflora, the commonest MDR microbes  
43 identified in severe patients are *Pseudomonas aeruginosa*, *Stenotrophomonas maltophilia*,  
44 *Acinetobacter* sp., and *Enterobacteriaceae*. *Staphylococcus aureus* (methicillin-resistant) and  
45 *Enterococci* sp. (vancomycin-resistant) are the most common gram-positive isolated,  
46 although their occurrence is falling (Jones, 2001; Boucher et al., 2009). Hospital-acquired  
47 infections (HAIs) have been known for over a century as a critical clinical issue affecting

48 healthcare quality, and they are the primary source of unfavourable healthcare outcomes (Aly  
49 et al., 2008; Memish and El-Saed, 2009; Nannini et al., 2009). The development of MDR  
50 microbes (MDRM) in the patient has become a public health issue, emerging as a new  
51 concern in many parts of the health system or hospitals (Jindal et al., 2015; Dogru et al.,  
52 2010; Teng et al., 2009; Aly et al., 2008). There is extensive use of antibiotics as a drug in  
53 critical care units, which establishes a selection burden and stimulates the development of  
54 MDRM (Teng et al., 2009; Aly et al., 2008). Further, an intensive care unit (ICU) patient is  
55 known to have a high risk of infection due to their underlying health conditions, exposure to  
56 various invasive devices, and weakened immunity (Dettenkofer et al., 2001; Ylipalosaari et  
57 al., 2006). The HAI rate in general wards is lower than that of ICU-HAI (Weinstein, 1998).  
58 The ICU-HAI has been associated with higher costs, morbidity, and mortality (Iskandar et al.,  
59 2021; Neidell et al., 2012; Montassier et al., 2013; Gastmeier et al., 2005). The objective of  
60 this research was to investigate HAI in various (ICUs, neonatal ICU (NICU), outpatient  
61 departments (OPD), male wards, female wards, pediatric wards, and medicine wards)  
62 departments to reveal the MDR microbial community, the anti-microbial resistance  
63 descriptions, including their effect on MDRM-related mortality and comorbidity.

## 64 **2. Materials and methods**

### 65 *2.1. Site of study and patients*

66 The study was performed as single-centre retrospective research at a 900-bed hospital (the  
67 Symbiosis University Hospital and Research Centre, SUHRC, Pune, Maharashtra, India),  
68 providing quality healthcare to the Pune's surrounding rural and upcoming urban areas. High  
69 patient numbers ensure extensive contact with the local community flows daily due to  
70 subsidized healthcare facilities and treatment strategies provided. The hospital provides for  
71 both inpatient and outpatient patient treatment services. The hospital possesses operation

72 theatres, ICUs, NICUs, Wards, OPDs. During Covid-19 (Coronavirus disease-2019), the  
73 hospital ran with specialized wards assigned to Covid-19-positive patients. The standard  
74 infection control measures (PPE, personal protective equipment) and sterilization protocols  
75 ([https://www.england.nhs.uk/national-infection-prevention-and-control-manual-nipcm-for-](https://www.england.nhs.uk/national-infection-prevention-and-control-manual-nipcm-for-england/chapter-1-standard-infection-control-precautions-sicps/)  
76 [england/chapter-1-standard-infection-control-precautions-sicps/](https://www.england.nhs.uk/national-infection-prevention-and-control-manual-nipcm-for-england/chapter-1-standard-infection-control-precautions-sicps/)) were followed to prevent  
77 cross-contamination and spread of Covid-19.

## 78 *2.2. Clinical data*

79 A descriptive retrospective investigation of the occurrence of MDR bacteria in patients  
80 treated at the hospital from January 2021 to April 2023, patients' samples were collected from  
81 the different hospital departments as a part of routine testing or when infections were  
82 suspected /presumed to be the cause underlying diseases (ICU, NICU, OPD, male ward,  
83 female ward, paediatric ward, and medicine ward). Clinical data information relevant to this  
84 study was collected and extracted from the departments mentioned above, patient medical  
85 charts, infection control surveillance forms, and microbiology laboratory results. The clinical  
86 data extracted also included - patient symptoms and comorbidities, neoplasm-related data and  
87 its treatment, and most importantly, MDR related infectious microorganisms and their  
88 resistance pattern (based on sensitivity to antibiotics, which are recorded data from  
89 microbiology laboratory culture test blood culture, etc.) MDRs were determined by applying  
90 the Centres for Disease Control and Prevention (CDC) parameters ([Horan et al., 2008](#)).

## 91 *2.3. Bacterial identification and susceptibility testing*

92 Microbial isolates were determined by applying the BD Phoenix Automated Microbiology  
93 System (USA) and Kirby-Bauer disk diffusion technique (Clinical and Laboratory Standards  
94 Institute, 2006.). The protocol detailed, by Carroll et al. (2006) and Hudzicki (2009), were  
95 applied to identification and antimicrobial susceptibility tests. Microorganism cultures were

96 obtained from patient samples from different anatomical locations on the body. We examined  
97 body fluids such as pus, urine, swabs (from the foot and near the colon), sputum, stool, BAL  
98 (Bronchoalveolar lavage) fluid, and ET (Endotracheal Secretion) secretion to determine the  
99 occurrence of antibiotic-resistant microbes or pathogens across the samples. The isolates  
100 *Escherichia coli*, *Klebsiella pneumoniae*, *Pseudomonas aeruginosa*, *Acinetobacter* sp., and  
101 *Citrobacter* sp., were examined to be MDR. An infection at many sites in the same patient  
102 was revealed as distinct infection events, except that an identical microbe was revealed  
103 concurrently. The clinical outcomes were evaluated up to hospital discharge or patient death.  
104 For the reasons of this study, patient death was determined concerning the HAIs/ or as non-  
105 HAIs-associated in agreement with the professional (Medical) who endorsed the patient  
106 death, including clinical chart data examined by three of the authors of this study.

#### 107 *2.4. Statistical analysis*

108 Descriptive statistics were used for categorised variables and expressed in terms of per cent  
109 frequency. The normal distribution and diversity (alpha and beta) index were applied to  
110 determine the variations in MDR-microbial populations between MDR patient samples  
111 (collected from 2021, 2022, and 2023 at SUHRC, Pune) used in this study.

### 112 **3. Results**

#### 113 *3.1. Overview of patient infection across all the samples*

114 One hundred patients aged one day to 98 years were included (data not shown). Eighty-five  
115 patients (out of 100 patients) were treated successfully and discharged (**Table 1**, data not  
116 shown), five patients (out of 100 patients) died (**Table 1**) in the hospital, and there was no  
117 clarity in the reporting of 10 patients' data whether they discharged or died. Fifty-three  
118 patients (53 %), 38 patients (38 %), and nine patients (9 %) were male, female, and child  
119 (female), respectively (**Table 1, Fig. S1**) with various clinical characteristics (data not shown

120 **and Table 1).** An overall lowest death rate of males were observed among patients (**Fig. 1A**).  
121 Patients with comorbidities or with no comorbidities are shown in Table 1. 18 patients with  
122 no co-existing comorbidities were observed (**Table 1** and data not shown). The medical  
123 conditions at presentation or during the hospital study included; UTI (urinary tract infection,  
124 35 % patient), sepsis (16 % patient), foot gangrene (3 % patient), respiratory disease (2 %  
125 patient), cancer (1 % patient), hepatic disease (1 % patient), hepatic cyst (1 % patient),  
126 asthma (1 % patient), IHD (ischemic heart disease, 1 % patient), CKD (chronic kidney  
127 disease, 1 % patient), septic shock (1 % patient), post-CAR (chimeric antigen receptors, 1 %  
128 patient) T-cell therapy, hyperthyroidism (1 % patient), osteoporosis (1 % patient),  
129 hemoperitoneum (1 % patient), multiple vessel (1 % patient), HIE (hypoxic-ischemic  
130 encephalopathy, 1 % patient), femur fracture (1 % patient), that were simultaneously present  
131 in a patient (**Table 1**). **Table 2** revealed the sample type distribution and predominance of  
132 MDR-gram-negative bacteria (MGNB). The sample urine from the patient showed the  
133 highest number (61) of MGNB (**Table 2**). In comparison the lowest number (2) of MGNB  
134 was present in stool samples (**Table 2**). In terms of bacterial species identified in the samples,  
135 MDR-*Klebsiella pneumoniae* was predominant in urine samples (**Table 2**).

### 136 3.2. Evaluation of antibiotic resistance

137 To evaluate antibiotic resistance, an antimicrobial susceptibility test (AST) was performed  
138 (**Table S1**). The AST of five GNBs, *Klebsiella pneumoniae* (*K. pneumoniae*), followed by  
139 *Escherichia coli* (*E. coli*), *Citrobacter* sp., *Pseudomonas aeruginosa* (*P. aeruginosa*), and  
140 *Acinetobacter* sp., were determined during our investigation (**Table S1**). Thirty-one  
141 antibiotics were used for susceptibility tests to reveal the MDR characteristics of GNBs  
142 isolated from patients. All five GNBs (*K. pneumoniae*, *E. coli*, *Citrobacter* sp., *P. aeruginosa*,  
143 and *Acinetobacter* sp.) showed the highest (100 %) resistance to ampicillin, ceftazidime, and  
144 ertapenem (**Table S1**). *K. pneumoniae*, *E. coli*, *P. aeruginosa*, and *Acinetobacter* sp. were

145 ampicillin/sulbactam-resistant (100 %) (**Table S1**). *K. pneumoniae*, *E. coli*, *Citrobacter* sp.,  
146 and *P. aeruginosa* were aztreonam-resistant (100 %) (**Table S1**). *K. pneumoniae*, *E. coli*,  
147 *Citrobacter* sp., and *Acinetobacter* sp. were ceftriaxone- and cefuroxime-resistant (100 %)  
148 (**Table S1**). *K. pneumoniae*, *Citrobacter* sp., and *Acinetobacter* sp. were cefotaxime- and  
149 cefixime-resistant (100 %) (**Table S1**). *Citrobacter* sp., *P. aeruginosa*, and *Acinetobacter* sp.  
150 were cotrimoxazole-, meropenem-, and gentamicin-resistant (100 %) (**Table S1**). *E. coli*, *P.*  
151 *aeruginosa*, and *Acinetobacter* sp. were ciprofloxacin-resistant (100 %) (**Table S1**).  
152 *Citrobacter* sp. and *Acinetobacter* sp. were amikacin-, cefepime-, and tobramycin-resistant  
153 (100 %) (**Table S1**). *E. coli* and *Citrobacter* sp. were ceftazidime avibactam-resistant (100  
154 %) (**Table S1**). *K. pneumoniae* and *E. coli* were ceftazidime avibactam-resistant (100 %)  
155 (**Table S1**). *K. pneumoniae* and *Acinetobacter* sp. were imipenem-, nitrofurantoin-, and  
156 piperacillin tazobactam-resistant (100 %) (**Table S1**). *Acinetobacter* sp. was amoxicillin  
157 clavulanic acid-, ceftazidime clavulanic acid-, cefoxitin-, and minocycline-resistant (100 %)  
158 (**Table S1**). *E. coli* was doripenem-resistant (100 %) (**Table S1**). Further, *E. coli* was  
159 tigecycline- and tetracycline-susceptible (100 %) (**Table S1**).

### 160 3.3. Identification of MGNB across all the samples

161 A total of 100 MGNBs belonging to c\_Gammaproteobacteria, were identified across all the  
162 samples. 28 %, 56 %, and 16 % MGNB were observed in 2021, 2022, and the early part of  
163 2023, respectively (**Fig. 1B**). Further, in the year 2021, 14 adult males, 11 adult females, and  
164 3 children (female) were infected with MGNB, while in the year 2022, 29 adult males, 23  
165 adult females, and 4 children (female) were found to be diseased with MGNB (**Fig. 1C**).  
166 Furthermore, in 2023, 10 adult males, 4 adult females, and 2 children (female) were infected  
167 with MGNB (**Fig. 1C**). The highest number of adult males, adult female, and children  
168 (female) patients with MGNB was revealed in the year 2022 (**Fig. 1C**), while the lowest

169 number of adult male, adult female, and children (female) patients with MGNB were  
170 observed in the year 2023 (**Fig. 1C**).

171 In 100 MGNB isolates, Pseudomonadota was noticed as the dominant phylum among  
172 the patient samples. Pseudomonadota alone shared 28, 56, and 16 of the total MGNB isolates  
173 in the patient samples collected in 2021, 2022, and 2023, respectively (**Fig. 1B**). The  
174 dominant MGNB isolates belonging to Gammaproteobacteria among the patient samples  
175 (**Fig. 1D**) depicted the genera *E. coli* (28 % isolates), *Citrobacter* sp. (19 % isolates), *K.*  
176 *pneumoniae* (40 % isolates), *P. aeruginosa* (7 % isolates), and *Acinetobacter* sp. (7 %  
177 isolates) (**Fig. S2**).

#### 178 3.4. Specific and shared MGNB population

179 The number of distinct and shared MGNB isolates present in the patient samples were  
180 examined applying a Venn diagram ([http://bioinformatics.psb.ugent.be/cgi-](http://bioinformatics.psb.ugent.be/cgi-bin/liste/Venn/calculate_venn.html)  
181 [bin/liste/Venn/calculate\\_venn.html](http://bioinformatics.psb.ugent.be/cgi-bin/liste/Venn/calculate_venn.html)) (**Fig. 1E, Table S2**). Five shared MGNB populations were  
182 identified across all samples. *E. coli*, *K. pneumoniae*, and *Citrobacter* sp. were shared  
183 between three patient samples (2021, 2022, and 2023), while *P. aeruginosa* and  
184 *Acinetobacter* sp. were shared between only two patient (2021 and 2022) and (2022 and  
185 2023) samples, respectively (**Fig. 1E, Table S2**).

#### 186 3.5. Identification of MGNB in patient (with comorbid) samples

187 *K. pneumoniae*, *E. coli*, and *Citrobacter* sp. were present in the patient (with comorbid  
188 medical conditions) samples collected in 2021 (**Fig. S3A**). *E. coli* (in UTI) was highest  
189 among the patient (with comorbid) samples (**Fig. S3A**), while *E. coli* (in sepsis and hepatic  
190 cyst), *K. pneumoniae* (in foot gangrene, respiratory disease, and Asthma), *Citrobacter* sp. (in  
191 femur fracture) were noted lowest in the patient (with comorbid) samples (**Fig. S3A**).



192 *K. pneumoniae*, *E. coli*, *P. aeruginosa*, *Citrobacter* sp., and *Acinetobacter* sp. were  
193 identified in patient (with comorbid medical conditions) samples collected in 2022 (**Fig.**  
194 **S3B**). *K. pneumoniae* (in UTI) was highest among the patient (with comorbid) samples (**Fig.**  
195 **S3B**) while *E. coli* (in sepsis, septic shock, cancer, and hemoperitonem), *Citrobacter* sp. (in  
196 sepsis, post-CAR, and osteoporosis), *K. pneumoniae* (in foot gangrene, respiratory disease,  
197 IHD, CKD, hepatic disease, hyperthyroidism) and *P. aeruginosa* (in foot gangrene) had the  
198 lowest representation in patient (with comorbid) samples (**Fig. S3B**).

199 *K. pneumoniae*, *E. coli*, *Citrobacter* sp., and *Acinetobacter* sp. were observed in the  
200 patient (with comorbid medical conditions) samples collected in 2023 (**Fig. S3C**). *E. coli* (in  
201 UTI) was highest among the patient (with comorbid) samples (**Fig. S3C**), while *K.*  
202 *pneumoniae* (in sepsis and multiple vessels), *Acinetobacter* sp. (in UTI and in HIE) had the  
203 lowest representation in the patient (with comorbid) samples (**Fig. S3C**).

### 204 3.6. Variance indices

205 Normal distribution, alpha and beta-diversity (taxonomic variance) of the MGNB population  
206 was determined utilizing data from various patient' samples. The Shapiro-Wilk (S-W) and  
207 Anderson-Darling (A-D) normality test were used to determine distributions of MGNB  
208 community within the patient samples. (**Table S3**). The S-W analysis for normality varied  
209 from 0.800 to 0.888, with a *P-value* of 0.081 to 0.351. The observed A-D normal distribution  
210 differed from 0.343 to 0.511, with a *P-value* of 0.098 to 0.315 (**Table S3**). The Alpha ( $\alpha$ -  
211 diversity metrics (Shannon, Simpson, Evenness, Brillouin, Fisher alpha, Chao1, and ACE) of  
212 the MGNB population were differed notably within the patient samples (**Table 3**). The values  
213 of Shannon diversity (1.138 to 1.508), Simpson diversity (0.643 to 0.775), Evenness diversity  
214 (0.780 to 1.042), and Brillouin diversity (0.933 to 1.340) (**Table 3**) revealed community  
215 structure with moderate species richness and abundance in patient samples. The values of

216 Fisher alpha and Chao1 ranged from 1.277 to 1.712 and 4 to 5, respectively (**Table 3**). The  
217 ACE (abundance-based coverage estimator; a species richness index) varied from 4.000 to  
218 5.111, with the increase index in MDR bacteria in 2021 among the patient samples (**Table 3**).  
219 Notably, the MDRs in the sample (2022) had more MGNB population than the other samples  
220 (**Table 3**). Palaeontological Statistics (PAST, v3) software package was applied to determine  
221 the beta ( $\beta$ ) diversity of the MGNB population between the patient samples (**Fig. 2A**)  
222 collected in 2021, 2022, and 2023. PCoA (principal coordinate analysis, based on the Bray-  
223 Kurtis index) was computed using eigenvalues and eigenvectors (coordinates) algorithm from  
224 Davis (1986). Before Eigen investigation, PCoA eigen values were produced to the  
225 transformation exponent (the power of C), and the definitive index was  $C = 2$ . The “Eigen  
226 value scaling” measure was applied for each axis, applying the square root of the eigen  
227 matrix (value), and the minimum spanning tree preference was based on the picked PCoA  
228 matrix. PCoA revealed the existence or absence of MGNB elements between the patient  
229 (2021, 2022, and 2023) samples (**Fig. 2A**). Further, analysis of the data, of pair-wise patient  
230 sample, comparisons was determined by applying the Bray-Kurtis similarity and dissimilarity  
231 index (**Table S4**). Bray-Kurtis pairwise similarity and distance index of the patient samples  
232 varied from 0.444 - 1.000 (**Table S4**). Moreover, the Whittaker indexes for the resemblance  
233 between MGNB population of the patient samples ranged from 0.11 - 0.25 (**Table S5**).

### 234 *3.7. Comparison of MGNB populations between de Souza GHA et al. (2023), Ruegsegger et* 235 *al. (2022), and in the present study*

236 In an effort to understand and correlate the MGNB populations of the present study bacterial  
237 communities with that present in the study of de Souza GHA et al. (2023), and Ruegsegger et  
238 al. (2022) (**Fig. 2B, Table 4**). *Pseudomonas* sp. and *Klebsiell* sp. were revealed at 6.0 and  
239 40.0 %, respectively, in the present study, while in the de Souza GHA et al. (2023), they were  
240 noted at 11.4 and 40.0 % (**Fig. 2B, Table 4**). Further, *E. coli* and *Citrobacter* sp. were

241 observed at 28.0 and 19.0 %, respectively in the present study, while in the de Souza GHA et  
242 al. (2023) they were noted at 2.8 and 2.8 % (**Fig. 2B, Table 4**). Furthermore, *Acinetobacter*  
243 sp. was present at 7.0 % in the present study, while in the de Souza GHA et al. (2023) they  
244 were revealed at 20.0 % (**Fig. 2B, Table 4**).

245 *Pseudomonas* sp. and *Klebsiella* sp. were present at 6.0 and 40.0 %, respectively, in the  
246 present study, while Ruegsegger et al. (2023), reported 34.0 and 14.0 %, respectively (**Fig.**  
247 **2B, Table 4**). Further, *E. coli* and *Citrobacter* sp. were present at 28.0 and 19.0 %, ,  
248 respectively, in the present study, while Ruegsegger et al. (2023) reported 7.0 and 7.0 %, ,  
249 respectively (**Fig. 2B, Table 4**). Furthermore, *Acinetobacter* sp. was present at 7.0 %, in the  
250 present study, while in the Ruegsegger et al. (2023) study, they were not reported (**Fig. 2B,**  
251 **Table 4**).

#### 252 **4. Discussion**

253 GNB are an important public health issue globally due to their antibiotic resistance  
254 characteristic ([Oliveira and Reygaert, 2022](#)). The invasion of the host by bacteria and the  
255 resulting infection is a versatile mechanism that includes various biological factors, i.e. the  
256 host defense mechanism, the prevalence and antibiotic susceptibility pattern of microbial  
257 isolates, various bio-physicochemical and genetic attributes ([Peterson, 1996](#)). The various  
258 virulence factors (persistence, transmissibility (ratio of output to input), cling to host cells,  
259 host cells invasion, toxigenicity, and the capability to elude or live the host's defence  
260 mechanism) of bacteria have been extensively investigated and have shown to have a  
261 negative impact on patient's health, particularly when a patient is immunocompromised due  
262 to severe disease ([Freeman et al., 2020](#); [Moradi et al., 2021](#)). Moreover, it would be valuable  
263 to investigate whether patient genotypes can influence survival by influencing the number of  
264 MGNB within them (increased or decreased count of MGNB).

265 ICU-MDR percentages are maximum than in other hospital wards (**Table 1**) due to the  
266 multiple associations between the patient's underlying medical conditions, hospital ward  
267 type, LOS (length of stay), and employment of various invasive tools (Erbay et al., 2003;  
268 Inweregbu et al., 2005; Vincent et al., 2009).

269 Among the 100 patients investigated, 85 (85 %) were discharged, while 5 (5 %) expired in  
270 the hospital (**Fig. 1A**). An overall lower mortality rate was found among elderly, severe  
271 patients (with comorbidities) admitted to the different units of the hospital. Our outcomes are  
272 not in concurrence with the investigations of Juliana et al. (2022) and Boorgula et al. (2022),  
273 who revealed a higher death rate in serious patients. Taking this observation into  
274 consideration, we speculate that the lower mortality rate, in our study, might be due to the  
275 higher immunity of studied patients during their hospitalization (Parohan et al., 2020; Weiss  
276 and Murdoch, 2020; Ejaz et al., 2020). However, such intrinsic protective factors have yet to  
277 be determined in specific populations to make the above claims regarding mortality.

278 In our investigation, *K. pneumoniae*, *E. coli*, *Citrobacter* sp., *Acinetobacter* sp., *P.*  
279 *aeruginosa* were the most frequent isolates (GNB) in various patient' samples (Vijay et al.,  
280 2021; Sharifipour et al., 2020). GNB isolates were higher in adult males than in adult females  
281 and children (female) (**Fig. 1C**). With this observation in view, we hypothesize that a higher  
282 level of an enzyme called carboxypeptidase (ACE 2, angiotensin-converting enzyme 2) in  
283 men and the predisposition of adult females (at reproductive age) to autoimmune disorder  
284 than infectious diseases might be the two reasons for higher MDR-GNB male than in female.  
285 Lifestyles of men (heavy smoking and drinking) make them more susceptible to infections  
286 (Ramírez-Soto et al., 2021; Bwire, 2020). Nevertheless, this is yet to be elucidated.

287 Regarding AST, we revealed *Acinetobacter* sp. to be the most (100 %) resistant strain when  
288 measured against twenty antibiotics (**Table S1**), while *Klebsiella* sp., was found to be 100 %

289 resistant against eleven antibiotics (**Table S1**). All these five different bacterial species (**Table**  
290 **S1**) were resistant to numerous antimicrobial agents, which gives them the title of multidrug-  
291 resistant bacteria ([Giannitsioti et al., 2022](#)). Surprisingly antibacterial resistance, in this study,  
292 is related to a decrease in the mortality rate compared with the previous study ([Tanwar et al.,](#)  
293 [2014](#)).

294 Our data provides evidence of an increase in antimicrobial resistance post-Covid-19 (**Fig. 1C**,  
295 data collected in 2022). This is in keeping with previous reports that have mentioned a similar  
296 pattern of increased antimicrobial resistance in specific locations ([Shomuyiwa et al., 2022](#)).  
297 Indiscriminate and irrational antimicrobial use and weak antimicrobials regulatory ecosystem,  
298 which could be partially attributed to health systems disruption by inadequate access to health  
299 services during the Covid-19 pandemic, are suggested causes for the rapid growth of  
300 antimicrobial resistance in the community ([Lobie et al., 2021](#); [Shomuyiwa et al., 2022](#)).  
301 Given the rapid increase in antimicrobial resistance post-Covid-19 in our study, it is  
302 important to further analyze how the policies adopted to manage Covid-19 (i.e. widespread  
303 antibiotic and disinfectant usage) affect or have a long-lasting consequence on  
304 antimicrobial resistance (AMR) ([Nieuwlaat et al., 2021](#)). Furthermore, programs at a  
305 governmental level need to be adopted widely, particularly in low- and middle-income  
306 countries (LMIC), to contain the possible increase in AMR ([Lucien et al., 2021](#)).

## 307 **5. Conclusion**

308 In conclusion, outcomes achieved from the present investigation revealed that MDR-  
309 microbes present in patients are predominantly elements of the gamma-proteobacteria.  
310 Antibacterial resistance has an important impact on therapeutics and the outcome of bacterial  
311 infection. In this study, five gram-negative bacteria, *K. pneumoniae*, *E. coli*, *Citrobacter* sp.,  
312 *Acinetobacter* sp., and *P. aeruginosa*, had increased resistance to the antibacterial agents

313 applied. Therefore, it is essential that the public health and drug susceptibility patterns of  
314 microorganisms initiating pathogen infection are continually observed to instruct clinical  
315 trials and treatment strategies, thereby reducing the appearance of multi-drug-resistant  
316 microbial pathogens.

### 317 **Declarations**

#### 318 **Ethics approval and consent to participate**

319 Patient samples and data were collected from the Symbiosis University Hospital and  
320 Research Centre (SUHRC), the Symbiosis International University, Pune, Maharashtra, India.

#### 321 **Consent to publish**

322 Not applicable.

#### 323 **Availability of data and materials**

324 All data is given in the main body of the manuscript; materials are available from the authors.  
325 All sequence data is added to manuscript as supplementary files (named as Figure S1 to S3,  
326 and Tables S1 to S6).

#### 327 **Competing interests**

328 The authors declare that they have no competing interests.

#### 329 **Funding**

330 No funds were used for this study.

#### 331 **Authors' contributions**

332 A.O. made substantial contributions to conception, was involved in analysis & interpretation  
333 of data, writing, revising and drafting the manuscript, and given final approval of the version  
334 to be published. D.W. made substantial contributions to writing discussion, editing the

335 manuscript, was involved in revising the manuscript, and given final approval of the version  
336 to be published. S.K. made substantial contributions to collect the data from SUHRC and  
337 given final approval of the version to be published. All authors reviewed the manuscript and  
338 given final approval of the version to be published.

### 339 **Authors' Information**

340 Symbiosis Institute of Health Sciences, Symbiosis International (Deemed University), Lavale  
341 (Hill Base), Pune 412115, Maharashtra, India.

### 342 **Acknowledgments**

343 We thank director, Symbiosis Institute of Health Sciences (SIHS) and Head, Symbiosis  
344 University Hospital and Research Centre (SUHRC), Pune for kind support.

### 345 **References**

- 346 1. Alós, J.I., 2015. Resistencia bacteriana a los antibióticos: una crisis global  
347 [Antibiotic resistance: A global crisis]. *Enferm Infecc Microbiol Clin*. 33(10),  
348 692-699. <https://doi.org/10.1016/j.eimc.2014.10.004>. PMID 25475657.
- 349 2. Hernando-Amado, S., Coque, T.M., Baquero, F., Martínez, J.L., 2019. Defining  
350 and combating antibiotic resistance from one health and global health  
351 perspectives. *Nat Microbiol*. 4(9), 1432-1442. [https://doi.org/10.1038/s41564-](https://doi.org/10.1038/s41564-019-0503-9)  
352 [019-0503-9](https://doi.org/10.1038/s41564-019-0503-9).
- 353 3. Klein, E.Y., Van Boeckel, T.P., Martinez, E.M., Pant, S., Gandra, S., Levin, S.A.,  
354 Goossens, H., Laxminarayan, R., 2018. Global increase and geographic  
355 convergence in antibiotic consumption between 2000 and 2015. *Proc Natl Acad*  
356 *Sci USA*. 115(15), E3463-E3470. <https://doi.org/10.1073/pnas.1717295115>.

- 357 4. Carvalho, M.J., Sands, K., Thomson, K., Portal, E., Mathias, J., Milton, R.,  
358 Gillespie, D., Dyer, C., Akpulu, C., Boostrom, I., Hogan, P., Saif, H., Ferreira, A.,  
359 Nieto, M., Hender, T., Hood, K., Andrews, R., Watkins, W.J., Hassan, B., Chan,  
360 G., Bekele, D., Solomon, S., Metaferia, G., Basu, S., Naha, S., Sinha, A.,  
361 Chakravorty, P., Mukherjee, S., Iregbu, K., Modibbo, F., Uwaezuoke, S., Audu, L.,  
362 Edwin, C.P., Yusuf, A.H., Adeleye, A., Mukkadas, A.S., Zahra, R., Shirazi, H.,  
363 Muhammad, A., Ullah, S.N., Jan, M.H., Akif, S., Mazarati, J.B., Rucogoza, A.,  
364 Gaju, L., Mehtar, S., Bulabula, A.N.H., Whitelaw, A., Roberts, L., BARNARDS,  
365 Group., Walsh, T.R., 2022. Antibiotic resistance genes in the gut microbiota of  
366 mothers and linked neonates with or without sepsis from low- and middle-income  
367 countries. *Nat Microbiol.* 7(9), 1337-1347. [https://doi.org/10.1038/s41564-022-](https://doi.org/10.1038/s41564-022-01184-y)  
368 [01184-y](https://doi.org/10.1038/s41564-022-01184-y).
- 369 5. Jones, R.N., 2001. Resistance patterns among nosocomial pathogens: trends over  
370 the past few years. *Chest.* 119(2 Suppl), 397S-404S. [https://doi.org/](https://doi.org/10.1378/chest.119.2_suppl.397s)  
371 [10.1378/chest.119.2\\_suppl.397s](https://doi.org/10.1378/chest.119.2_suppl.397s).
- 372 6. Boucher, H.W., Talbot, G.H., Bradley, J.S., Edwards, J.E., Gilbert, D., Rice, L.B.,  
373 Scheld, M., Spellberg, B., Bartlett, J., 2009. Bad bugs, no drugs: no ESKAPE! an  
374 update from the infectious diseases society of America. *Clin Infect Dis.* 48(1), 1-  
375 12. <https://doi.org/10.1086/595011>.
- 376 7. Aly, N.Y., Al-Mousa, H.H., Al Asarel, S.M., 2008. Nosocomial infections in a  
377 medical-surgical intensive care unit. *Med Princ Pract.* 17(5), 373-377.  
378 <https://doi.org/10.1159/000141500>.
- 379 8. Memish, Z.A., and El-Saed, A., 2009. Nosocomial infections in a medical-surgical  
380 intensive care unit in Kuwait. *Med Princ Pract.* 18(4), 342; author reply 342-343.  
381 <https://doi.org/10.1159/000215737>.



- 382 9. Nannini, M., Foddi, F., Murgia, G., Pisci, R., Sanna, F., Testa, M., Accotto, G.P.,  
383 2009. An epidemiological survey of TYLCD in southern Sardinia (Italy).  
384 *Commun Agric Appl Biol Sci.* 74(3), 831-841. [PMID 20222569](https://pubmed.ncbi.nlm.nih.gov/20222569/).
- 385 10. Jindal, A.K., Pandya, K., Khan, I.D., 2015. Antimicrobial resistance: a public  
386 health challenge. *Med J Armed Forces India.* 71(2), 178-181.  
387 <https://doi.org/10.1016/j.mjafi.2014.04.011>.
- 388 11. Dogru, A., Sargin, F., Celik, M., Sagioglu, A.E., Goksel, M.M., Sayhan, H., 2010.  
389 The rate of device-associated nosocomial infections in a medical surgical  
390 intensive care unit of a training and research hospital in Turkey: one-year  
391 outcomes. *Jpn J Infect Dis.* 63(2), 95-98. [PMID 20332569](https://pubmed.ncbi.nlm.nih.gov/20332569/).
- 392 12. Teng, S.O., Lee, W.S., Ou, T.Y., Hsieh, Y.C., Lee, W.C., Lin, Y.C., 2009. Bacterial  
393 contamination of patients' medical charts in a surgical ward and the intensive care  
394 unit: impact on nosocomial infections. *J Microbiol Immunol Infect.* 42(1), 86-91.  
395 [PMID 19424563](https://pubmed.ncbi.nlm.nih.gov/19424563/).
- 396 13. Dettenkofer, M., Ebner, W., Els, T., Babikir, R., Lucking, C., Pelz, K., Rüden, H.,  
397 Daschner, F., 2001. Surveillance of nosocomial infections in a neurology intensive  
398 care unit. *J Neurol.* 248(11), 959-964. <https://doi.org/10.1007/s004150170048>.
- 399 14. Ylipalosaari, P., Ala-Kokko, T.I., Laurila, J., Ohtonen, P., Syrjälä, H., 2006.  
400 Intensive care acquired infection is an independent risk factor for hospital  
401 mortality: a prospective cohort study. *Crit Care.* 10(2), R66.  
402 <https://doi.org/10.1186/cc4902>.
- 403 15. Weinstein, R.A., 1998. Nosocomial infection update. *Emerg Infect Dis.* 4(3), 416-  
404 420. <https://doi.org/10.3201/eid0403.980320>.
- 405 16. Iskandar, K., Roques, C., Hallit, S., Husni-Samaha, R., Dirani, N., Rizk, R., Abdo,  
406 R., Yared, Y., Matta, M., Mostafa, I., Matta, R., Salameh, P., Molinier, L., 2021.

- 407           The healthcare costs of antimicrobial resistance in Lebanon: a multi-centre  
408           prospective cohort study from the payer perspective. *BMC Infect Dis.* 21(1), 404.  
409           <https://doi.org/10.1186/s12879-021-06084-w>.
- 410           17. Neidell, M.J., Cohen, B., Furuya, Y., Hill, J., Jeon, C.Y., Glied, S., Larson, E.L.,  
411           2012. Costs of healthcare- and community-associated infections with  
412           antimicrobial-resistant versus antimicrobial-susceptible organisms. *Clin Infect*  
413           *Dis.* 55(6), 807-815. <https://doi.org/10.1093/cid/cis552>.
- 414           18. Montassier, E., Batard, E., Gastinne, T., Potel, G., de La Cochetière, M.F., 2013.  
415           Recent changes in bacteremia in patients with cancer: a systematic review of  
416           epidemiology and antibiotic resistance. *Eur J Clin Microbiol Infect Dis.* 32(7),  
417           841-850. <https://doi.org/10.1007/s10096-013-1819-7>.
- 418           19. Gastmeier, P., Sohr, D., Geffers, C., Behnke, M., Daschner, F., Rüden, H., 2005.  
419           Mortality risk factors with nosocomial *Staphylococcus aureus* infections in  
420           intensive care units: results from the German nosocomial infection surveillance  
421           system (KISS). *Infection.* 33(2), 50-55. [https://doi.org/10.1007/s15010-005-3186-](https://doi.org/10.1007/s15010-005-3186-5)  
422           5.
- 423           20. Horan, T.C., Andrus, M., Dudeck, M.A., 2008. CDC/NHSN surveillance  
424           definition of health care-associated infection and criteria for specific types of  
425           infections in the acute care setting. *Am J Infect Control.* 36(5), 309-332.  
426           <https://doi.org/10.1016/j.ajic.2008.03.002>. Erratum in: *Am J Infect Control.* 36(9),  
427           655. PMID 18538699.
- 428           21. Clinical and Laboratory Standards Institute, 2006. Performance standards for  
429           antimicrobial susceptibility testing. 13th Informational Supplement, Vol. 25, No.  
430           26. Approved Standard M2-A7. Wayne, PA: CLSI.

- 431 22. Carroll, K.C., Glanz, B.D., Borek, A.P., Burger, C., Bhally, H.S., Henciak, S.,  
432 Flayhart, D., 2006. Evaluation of the BD phoenix automated microbiology system  
433 for identification and antimicrobial susceptibility testing of Enterobacteriaceae. *J*  
434 *Clin Microbiol.* 44(10), 3506-3509. <https://doi.org/10.1128/JCM.00994-06>.
- 435 23. Hudzicki, J., 2009. Kirby-Bauer disk diffusion susceptibility test protocol.  
436 American Society for Microbiology.
- 437 24. Davis, J.C., 1986. *Statistics and Data Analysis in Geology*. John Wiley & Sons.
- 438 25. de Souza, G.H.A., de Oliveira, A.R., Dos Santos Barbosa, M., Rossato, L., da  
439 Silva Barbosa, K., Simionatto, S., 2023. Multidrug-resistant gram-negative  
440 bacteria in patients with COVID-19: an epidemiological and clinical study. *J*  
441 *Infect Public Health.* 16(8), 1184-1192. <https://doi.org/10.1016/j.jiph.2023.05.017>.
- 442 26. Ruegsegger, L., Xiao, J., Naziripour, A., Kanumuambidi, T., Brown, D., Williams,  
443 F., Marshall, S.H., Rudin, S.D., Yen, K., Chu, T., Chen, L., Sozzi, E., Bartelt, L.,  
444 Kreiswirth, B., Bonomo, R.A., van Duin, D., 2022. Multidrug-resistant gram-  
445 negative bacteria in burn patients. *Antimicrob Agents Chemother.* 66(9),  
446 e0068822. <https://doi.org/10.1128/aac.00688-22>.
- 447 27. Oliveira, J., Reygaert, W.C., 2022. Gram-negative bacteria. In: *StatPearls*  
448 [Internet]. Treasure Island (FL): StatPearls Publishing. PMID 30855801.
- 449 28. Peterson, J.W., 1996. Bacterial pathogenesis. In: Baron S, editor. *Medical*  
450 *Microbiology*. 4th ed. Galveston (TX): University of Texas Medical Branch at  
451 Galveston. Chapter 7. PMID 21413346.
- 452 29. Freeman, A.M., Leigh, T.R., 2020. JrViral Pneumonia. In: *StatPearls*. StatPearls  
453 Publishing. Treasure Island (FL) PMID 30020658.
- 454 30. Moradi, N., Kazemi, N., Ghaemi, M., Mirzaei, B., 2021. Frequency and  
455 antimicrobial resistance pattern of bacterial isolates from patients with COVID-19

- 456 in two hospitals of Zanjan. *Iran J Microbiol.* 13(6), 769-778.  
457 <https://doi.org/10.18502/ijm.v13i6.8078>.
- 458 31. Erbay, H., Yalcin, A.N., Serin, S., Turgut, H., Tomatir, E., Cetin, B., Zencir, M.,  
459 2003. Nosocomial infections in intensive care unit in a Turkish university hospital:  
460 a 2-year survey. *Intensive Care Med.* 29(9), 1482-1488.  
461 <https://doi.org/10.1007/s00134-003-1788-x>.
- 462 32. Inweregbu, K., and others., 2005. Nosocomial infections, continuing education in  
463 anaesthesia critical care & pain. 5(1), 14-  
464 17, <https://doi.org/10.1093/bjaceaccp/mki006>.
- 465 33. Vincent, J.L., Rello, J., Marshall, J., Silva, E., Anzueto, A., Martin, C.D., Moreno,  
466 R., Lipman, J., Gomersall, C., Sakr, Y., Reinhart, K., 2009. EPIC II group of  
467 investigators. International study of the prevalence and outcomes of infection in  
468 intensive care units. *JAMA.* 302(21), 2323-2329.  
469 <https://doi.org/10.1001/jama.2009.1754>.
- 470 34. Juliana, A., Ramya, S., Leela, K.V., 2022. Prevalence and antimicrobial  
471 susceptibility pattern of secondary gram-negative bacteria isolated from severe  
472 acute respiratory syndrome coronavirus disease 2 patients in a tertiary care  
473 hospital. *J Pure Appl Microbiol.* 16(4), 2514-2520.  
474 <https://doi.org/10.22207/JPAM.16.4.13>.
- 475 35. Boorgula, S.Y., Yelamanchili, S., Kottapalli, P., Naga, M.D., 2022. An update on  
476 secondary bacterial and fungal infections and their antimicrobial resistance pattern  
477 (AMR) in Covid-19 confirmed patients. *J Lab Physicians.* 14(3), 260-264.  
478 <https://doi.org/10.1055/s-0041-1741438>.
- 479 36. Parohan, M., Yaghoubi, S., Seraji, A., Javanbakht, M.H., Sarraf, P., Djalali, M.,  
480 2020. Risk factors for mortality in patients with coronavirus disease 2019 (Covid-

- 481 19) infection: a systematic review and meta-analysis of observational studies.  
482 Aging Male. 23(5),1416-1424. <https://doi.org/10.1080/13685538.2020.1774748>.
- 483 37. Weiss, P., Murdoch, D.R., 2020. Clinical course and mortality risk of severe  
484 Covid-19. Lancet. 395(10229), 1014-1015. [https://doi.org/10.1016/S0140-6736\(20\)30633-4](https://doi.org/10.1016/S0140-6736(20)30633-4).
- 485  
486 38. Ejaz, H., Alsrhani, A., Zafar, A., Javed, H., Junaid, K., Abdalla, A.E., Abosalif,  
487 K.O.A., Ahmed, Z., Younas, S., 2020. Covid-19 and comorbidities: deleterious  
488 impact on infected patients. J Infect Public Health. 13(12), 1833-1839.  
489 <https://doi.org/10.1016/j.jiph.2020.07.014>.
- 490 39. Vijay, S., Bansal, N., Rao, B.K., Veeraraghavan, B., Rodrigues, C., Wattal, C.,  
491 Goyal, J.P., Tadepalli, K., Mathur, P., Venkateswaran, R., Venkatasubramanian, R.,  
492 Khadanga, S., Bhattacharya, S., Mukherjee, S., Baveja, S., Sistla, S., Panda, S.,  
493 Walia, K., 2021. Secondary infections in hospitalized Covid-19 patients: Indian  
494 experience. Infect Drug Resist. 14, 1893-1903.  
495 <https://doi.org/10.2147/IDR.S299774>.
- 496 40. Sharifipour, E., Shams, S., Esmkhani, M., Khodadadi, J., Fotouhi-Ardakani, R.,  
497 Koohpaei, A., Doosti, Z., Ej Golzari, S., 2020. Evaluation of bacterial co-  
498 infections of the respiratory tract in Covid-19 patients admitted to ICU. BMC  
499 Infect Dis. 20(1), 646. <https://doi.org/10.1186/s12879-020-05374-z>.
- 500 41. Ramírez-Soto, M.C., Arroyo-Hernández, H., Ortega-Cáceres, G., 2021. Sex  
501 differences in the incidence, mortality, and fatality of Covid-19 in Peru. PLoS  
502 One. 16(6), e0253193. <https://doi.org/10.1371/journal.pone.0253193>.
- 503 42. Bwire, G.M., 2020. Coronavirus: Why men are more vulnerable to Covid-19 than  
504 women? SN Compr Clin Med. 2(7), 874-876. <https://doi.org/10.1007/s42399-020-00341-w>.
- 505

- 506 43. Giannitsioti, E., Salles, M.J., Mavrogenis, A., Rodriguez-Pardo, D., Los-Arcos, I.,  
507 Ribera, A., Ariza, J., Del Toro, M.D., Nguyen, S., Senneville, E., Bonnet, E.,  
508 Chan, M., Pasticci, M.B., Petersdorf, S., Benito, N., O' Connell, N., Blanco  
509 García, A., Skaliczki, G., Tattevin, P., Kocak Tufan, Z., Pantazis, N.,  
510 Megaloikonomos, P.D., Papagelopoulos, P., Soriano, A., Papadopoulos, A., 2022.  
511 The Esgiai collaborators Study Group. Osteosynthesis-associated infection of the  
512 lower limbs by multidrug-resistant and extensively drug-resistant Gram-negative  
513 bacteria: a multicentre cohort study. *J Bone Jt Infect.* 7(6), 279-288.  
514 <https://doi.org/10.5194/jbji-7-279-2022>.
- 515 44. Tanwar, J., Das, S., Fatima, Z., Hameed, S., 2014. Multidrug resistance: an  
516 emerging crisis. *Interdiscip Perspect Infect Dis.* 2014, 541340.  
517 <https://doi.org/10.1155/2014/541340>.
- 518 45. Shomuyiwa, D.O., Lucero-Prisno, D.E. 3<sup>rd</sup>., Manirambona, E., Suleman, M.H.,  
519 Rayan, R.A., Huang, J., Zaw, T.N., Babatunde, Y., Denkyira, S.A., Musa, S.S.,  
520 2022. Curbing antimicrobial resistance in post-Covid Africa: challenges, actions  
521 and recommendations. *Health Sci Rep.* 5(5), e771.  
522 <https://doi.org/10.1002/hsr2.771>.
- 523 46. Lobie, T.A., Roba, A.A., Booth, J.A., Kristiansen, K.I., Aseffa, A., Skarstad, K.,  
524 Bjørås, M., 2021. Antimicrobial resistance: a challenge awaiting the post-Covid-  
525 19 era. *Int J Infect Dis.* 111, 322-325. <https://doi.org/10.1016/j.ijid.2021.09.003>.
- 526 47. Nieuwlaat, R., Mbuagbaw, L., Mertz, D., Burrows, L.L., Bowdish, D.M.E., Moja,  
527 L., Wright, G.D., Schünemann, H.J., 2021. Coronavirus disease 2019 and  
528 antimicrobial resistance: parallel and interacting health emergencies. *Clin Infect*  
529 *Dis.* 72(9), 1657-1659. <https://doi.org/10.1093/cid/ciaa773>.

530 48. Lucien, M.A.B., Canarie, M.F., Kilgore, P.E., Jean-Denis, G., Fénélon, N., Pierre,  
531 M., Cerpa, M., Joseph, G.A., Maki, G., Zervos, M.J., Dely, P., Boncy, J., Sati, H.,  
532 Rio, A.D., Ramon-Pardo, P., 2021. Antibiotics and antimicrobial resistance in the  
533 Covid-19 era: Perspective from resource-limited settings. *Int J Infect Dis.*104,  
534 250-254. <https://doi.org/10.1016/j.ijid.2020.12.087>.

### 535 **Figure legends**

536 **Fig. 1** Overview of study. (A) Outcomes of patients with MDR-gram negative bacterial  
537 pathogens. (B) Percentage overview of patients with MDR-gram negative bacterial  
538 pathogens. (C) Distribution of MDR-gram negative bacterial pathogens in adult male, adult  
539 female, and children (female). (D) Relative abundance of different MDR-gram negative  
540 bacterial pathogens among all patient samples at the level of genus. (E) Identification of  
541 specific and shared MDR-gram negative bacterial pathogens among the patient samples.

542 **Fig. 2** Principal coordinate analysis and comparative overview of MGNB communities  
543 identified in patients. (A) Analysis of MDR-gram negative bacterial pathogens diversity in  
544 the patient samples collected in different, 2021, 2022, and 2023, years. MDR-gram negative  
545 bacterial pathogens diversity in the patient samples using principal coordinate analysis  
546 (PCoA-Bray-Kurtis index). (B) Comparative overview of MDR-gram negative bacterial  
547 communities identified in patient samples of the Hospital-acquired infection (in this study),  
548 de Souza GHA et al (2023), and Ruegsegger et al (2022).

### 549 **Table legends**

550 **Table 1** |Representation and clinical traits in patients with hospital-acquired infections (HAI,  
551 2021-2023).

552 **Table 2** |Predominance of MDR-gram negative bacterial pathogens from different sample  
553 types of patients.

554 **Table 3**| Alpha-diversity indices and the estimated richness of MDR-gram negative bacterial  
555 population in the patient samples.

556 **Table 4**| Comparative overview of MDR-gram negative bacterial populations identified in  
557 patients from investigation of de Souza GHA et al., 2023, Ruegsegger et al., 2022, and in this  
558 study.

### 559 **Supplementary material**

560 **Fig. S1**| Overview of MDR-gram negative bacterial pathogens collected from the gender  
561 wise patients.

562 **Fig. S2**| Relative abundance of different MDR-gram negative bacterial pathogens among all  
563 patient samples at the level of species.

564 **Fig. S3**| Description of MDR-gram negative bacterial pathogens among the patient with  
565 comorbid condition collected in different, (A) 2021, (B) 2022, and (C) 2023, years from  
566 hospital.

567 **Table S1**| Antimicrobial susceptibility tests. Antimicrobial susceptibility tests of MGNB  
568 pathogens collected from patient samples.

569 **Table S2**| Labeling of specific and shared MGNB communities among the patient samples  
570 during Covid-19 and post-Covid-19 year. (A) Specific MGNB communities (specific and  
571 shared) in patient samples. (B) Shared MGNB communities in patient samples.

572 **Table S3**| Statistics of MGNB collected different years from the patient samples.

573 **Table S4**| Bray-Kurtis pairwise similarity and distance (dissimilarity) index of MGNB  
574 population among the patient samples collected in 2021, 2022, and 2023.



575 **Table S5** Beta-diversity, Whittaker indexes, and pair-wise comparisons between the patient  
576 samples based on MGNB populations.

577

578

579

580

Fig. 1

A

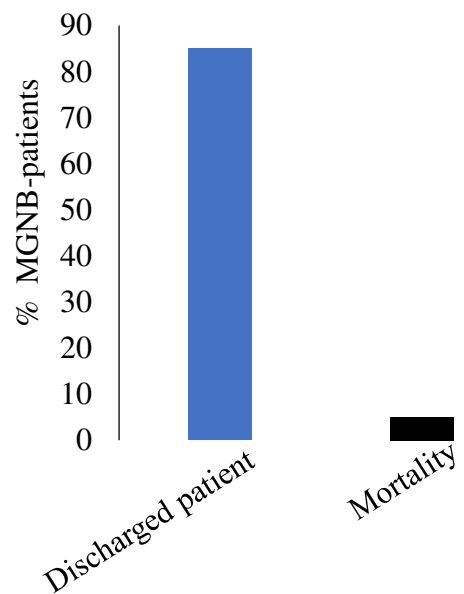

B

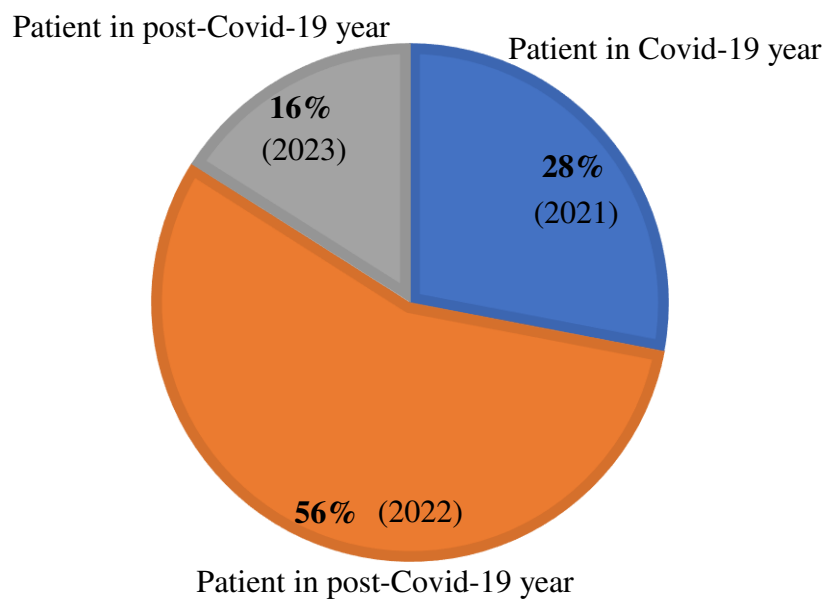

C

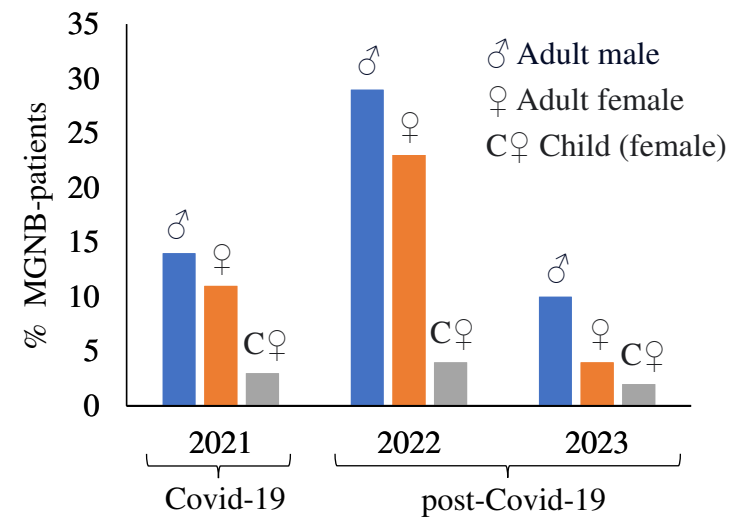

D

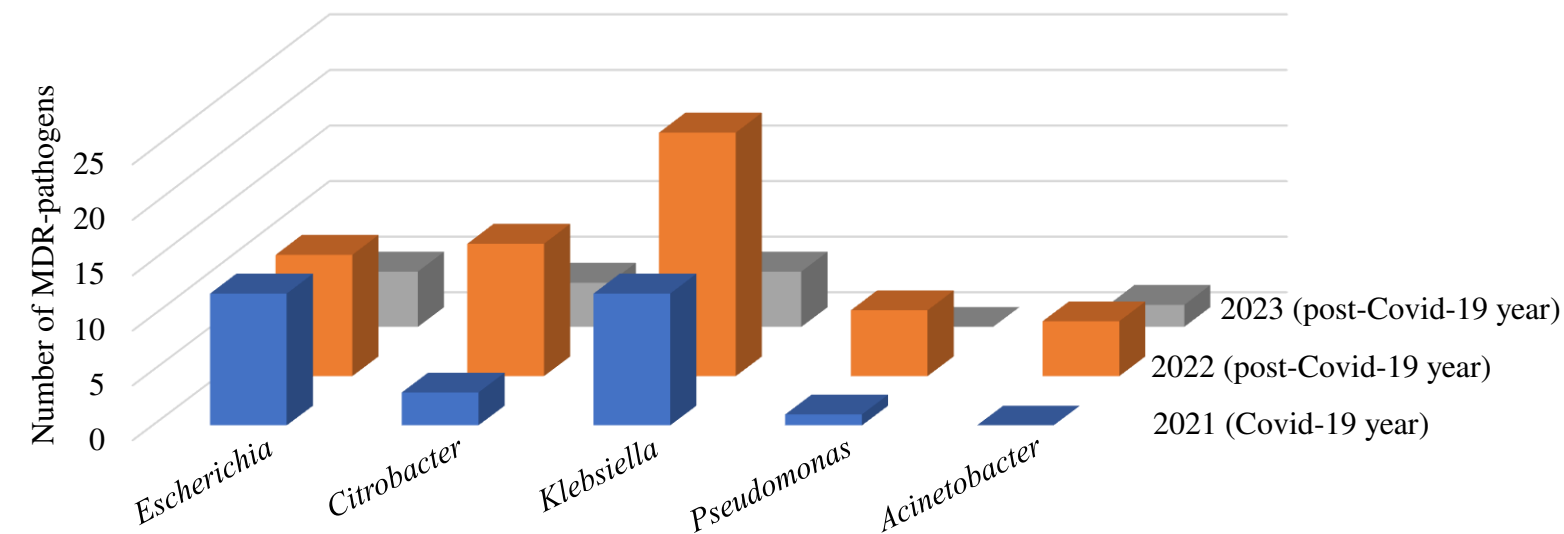

E

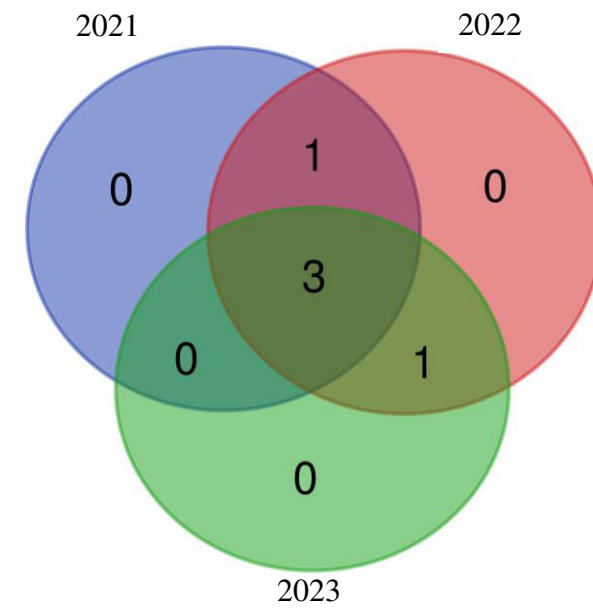

Fig. 2

A

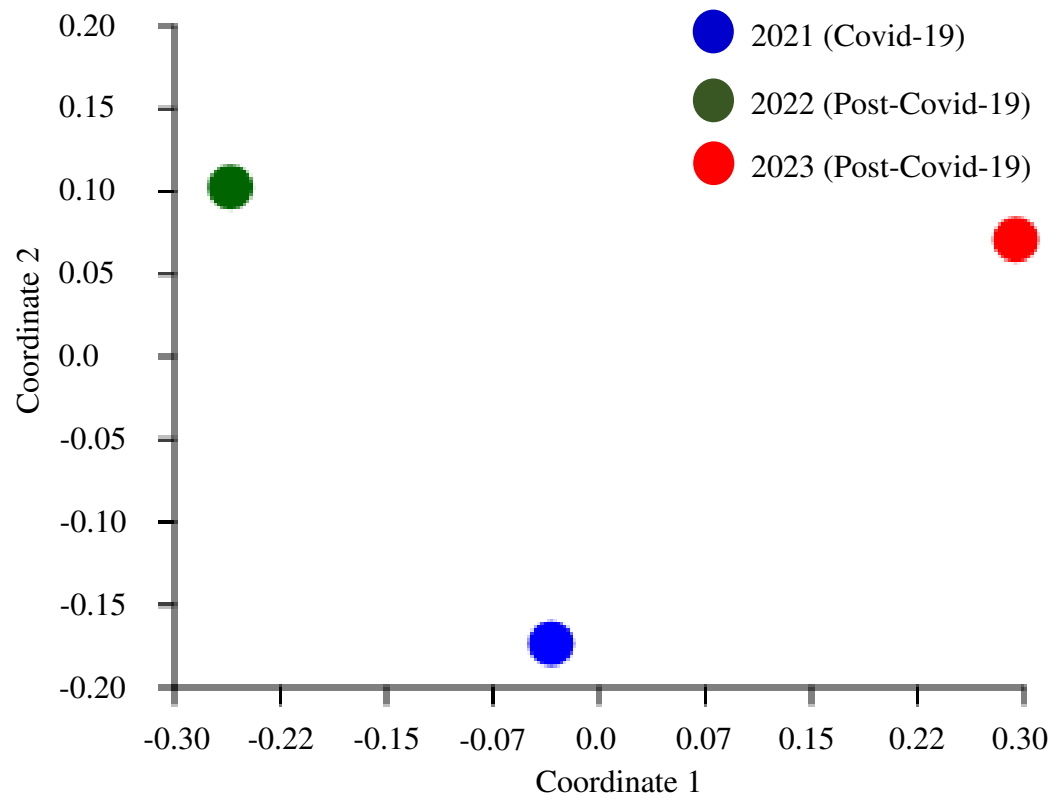

B

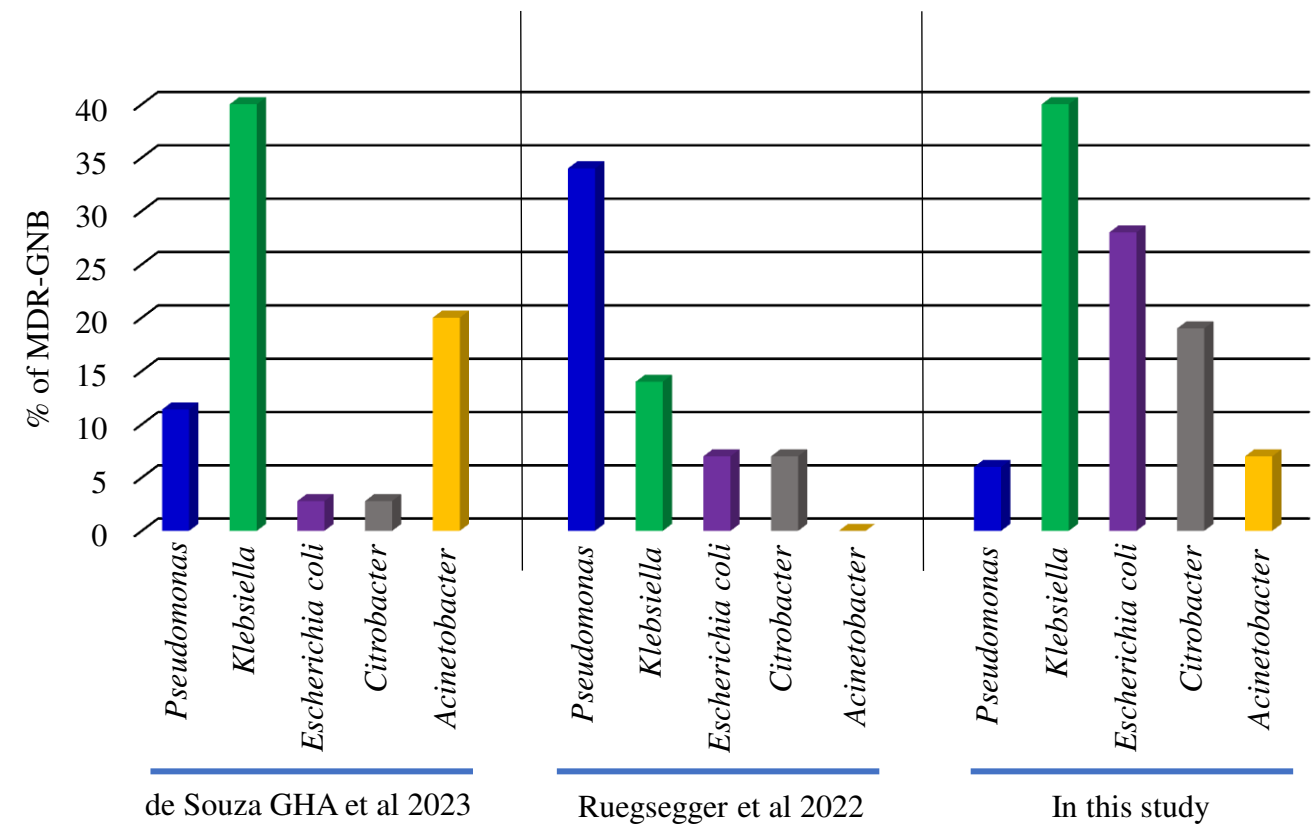

Table 1| Characteristics of hospital stay of patients with or without comorbidities, 2021-2023 (Covid-19/ or post Covid-19) period.

| S. No. | Characteristic                                     | Patients (N=100) |
|--------|----------------------------------------------------|------------------|
| 1      | Age (range)                                        | 1 day - 98 years |
| 2      | Discharged                                         | 85 (85 %)        |
| 3      | Death                                              | 5 (5 %)          |
| 4      | Male (adult)                                       | 53 (53 %)        |
| 5      | Female (adult)                                     | 38 (38 %)        |
| 6      | Children (female)                                  | 9 (9 %)          |
| 7      | Male ward                                          | 27 (27 %)        |
| 8      | Female ward                                        | 25 (25 %)        |
| 9      | Intensive care unit (ICU) admission                | 29 (29 %)        |
| 10     | Outpatient department (OPD)                        | 12 (12 %)        |
| 11     | Pediatric ward                                     | 4 (4 %)          |
| 12     | Neonatal intensive care unit (NICU) admission      | 1 (1 %)          |
| 13     | Comorbidities                                      |                  |
| a.     | no comorbidities                                   | 18 (18 %)        |
| b.     | Urinary Tract Infection (UTI)                      | 35 (35 %)        |
| c.     | Sepsis                                             | 16 (16 %)        |
| d.     | Foot gangrene                                      | 3 (3 %)          |
| e.     | Respiratory disease                                | 2 (1 %)          |
| f.     | Cancer                                             | 1 (1 %)          |
| g.     | Hepatic disease                                    | 1 (1 %)          |
| h.     | Hepatic cyst                                       | 1 (1 %)          |
| i.     | Asthma                                             | 1 (1 %)          |
| j.     | Ischemic heart disease (IHD)                       | 1 (1 %)          |
| k.     | Chronic kidney disease (CKD)                       | 1 (1 %)          |
| l.     | Septic shock                                       | 1 (1 %)          |
| m.     | Post-compensatory anti-inflammatory response (CAR) | 1 (1 %)          |
| n.     | Hyperthyroidism                                    | 1 (1 %)          |
| o.     | Osteoporosis                                       | 1 (1 %)          |
| p.     | Hemoperitoneum                                     | 1 (1 %)          |
| q.     | Multiple vessel                                    | 1 (1 %)          |
| r.     | Hypoxic-ischemic encephalopathy (HIE)              | 1 (1 %)          |
| s.     | Femur fracture                                     | 1 (1 %)          |

Table 2| Dominancy of MDR bacterial isolates from different types of patient's sample.

| Isolates                      | Sample types |       |      |        |       |     |    |
|-------------------------------|--------------|-------|------|--------|-------|-----|----|
|                               | Pus          | Urine | SWAB | Sputum | Stool | BAL | ET |
| <i>Klebsiella pneumoniae</i>  | 7            | 20    | 3    | 2      | 2     | 2   | 3  |
| <i>Escherichia coli</i>       | 2            | 18    | 4    | 1      | 0     | 0   | 1  |
| <i>Citrobacter</i>            | 2            | 16    | 0    | 0      | 0     | 0   | 1  |
| <i>Pseudomonas aeruginosa</i> | 1            | 6     | 0    | 0      | 0     | 0   | 0  |
| <i>Acinetobacter</i>          | 2            | 1     | 2    | 1      | 0     | 1   | 0  |
| Total                         | 14           | 61    | 9    | 4      | 2     | 3   | 4  |

Note# Pus; A thick, whitish-yellow fluid of WBCs (white blood cells), cellular debris, and liquefied tissue. SWAB; a medical device used for the collection of biological samples from the patient body. BAL; Bronchoalveolar lavage, ET; Endotracheal secretion.

Table 3| Alpha-diversity metrics of MDR bacterial population in the patient samples.

| Sample name          | Shannon | Simpson | Evenness | Brilloom | Fisher-alpha | Chao1 | ACE    | Observed species |
|----------------------|---------|---------|----------|----------|--------------|-------|--------|------------------|
| 2021 (Covid-19)      | 1.138   | 0.643   | 0.780    | 0.933    | 1.277        | 4     | 5.111  | 28               |
| 2022 (post Covid-19) | 1.508   | 0.755   | 0.903    | 1.340    | 1.328        | 5     | 5.000  | 56               |
| 2023 (post Covid-19) | 1.427   | 0.775   | 1.042    | 1.077    | 1.712        | 4     | 4.000  | 16               |
| Total                | 4.073   | 2.173   | 2.725    | 3.350    | 4.317        | 13    | 14.111 | 100              |

Table 4| Comparative synopsis of MDR bacteria observed in present study patient' samples (during Hospital stay), de Souza GHA et al., 2023, and Ruegsegger et al., 2022. (ND; Not determined).

| S. No. | MDR microbes            | Present study (%) | de Souza GHA et al., 2023, (%) | Ruegsegger et al., 2022, (%) |
|--------|-------------------------|-------------------|--------------------------------|------------------------------|
| 1      | <i>Pseudomonas</i>      | 6.0               | 11.4                           | 34.0                         |
| 2      | <i>Klebsiella</i>       | 40.0              | 40.0                           | 14.0                         |
| 3      | <i>Escherichia coli</i> | 28.0              | 2.8                            | 7.0                          |
| 4      | <i>Citrobacter</i>      | 19.0              | 2.8                            | 7.0                          |
| 5      | <i>Acinetobacter</i>    | 7.0               | 20.0                           | ND                           |
